# Supplementary material for: Optimized Extraction of Amikacin from Murine Whole Blood
Source: MDPI journal article supplement (doi:10.3390/molecules26030665), 2021-01-27
Supplement: s1 [file s1]

## Supplementary Materials

### Optimized extraction of Amikacin from murine whole blood

Roccaldo Sardella<sup>1,2</sup>, Styliani Xiroudaki<sup>1</sup>, Laura Mercolini<sup>3</sup>, Samuele Sabbatini<sup>4</sup>,  
Claudia Monari<sup>4</sup>, Stefano Perito<sup>4</sup>, Federica Ianni<sup>1\*</sup>, Anna Vecchiarelli<sup>4</sup>, Stefano Giovagnoli<sup>1</sup>

<sup>1</sup>Department of Pharmaceutical Sciences, University of Perugia, Via Fabretti 48, 06123 Perugia (Italy)

<sup>2</sup>Center for Perinatal and Reproductive Medicine, University of Perugia, Santa Maria della Misericordia University Hospital, 06132 Perugia (Italy)

<sup>3</sup>Department of Pharmacy and Biotechnology (FaBiT), Alma Mater Studiorum, University of Bologna, Via Belmeloro 6, 40126 Bologna (Italy)

<sup>4</sup>Department of Medicine, Medical Microbiology Section, University of Perugia, Piazzale Gambuli 1, 06132 Perugia (Italy)

\*Corresponding author:

Dr. Federica Ianni, Department of Pharmaceutical Sciences, Via Fabretti 48, 06123 Perugia (Italy)

[federica.ianni@unipg.it](mailto:federica.ianni@unipg.it)

## **HPLC-PDA analysis**

The HPLC study was performed on a Waters ALLIANCE 2695 Separations Module system equipped with a quaternary, low-pressure mixing pump and in-line vacuum degassing, an autosampler with maximum capacity of 120 vials and a column heater/cooler. The system is endowed with a photodiode array (PDA) detector (Waters 2996). The data management was made by a Waters® Millennium®32 Software.

The derivatized samples were analysed according to the following HPLC-UV/Vis method: column, Robusta C18 (250 x 4.6 mm I.D., 5 µm, 110 Å, from SepaChrom, Rho, Italy); mobile phase, ACN/water/AcOH (47:53:0.1, v/v/v); eluent flow rate, 1.0 mL/min; column temperature, 45 °C; sample rack temperature, 20 °C; wavelength of detection, 365 nm; injection volume, 20 µL. After each analysis, the column was always washed with methanol for 15 min at a 1.0 mL/min flow rate.

**The selection of the above detection wavelength was done according to the paper by Nicoli and Santi [Journal of Pharmaceutical and Biomedical Analysis 41 (2006) 994–997].**

**The physicochemical features of Amk makes this molecule completely soluble in the ternary mixture employed as mobile phase. Moreover, no carry over effect was observed for Amk between consecutive injections. A different situation was instead found for other species whose wash out was complete only with methanol, while only partial with acetonitrile. Therefore, methanol cannot be regarded as a mobile phase component, since it was exclusively used to ensure the complete cleaning of the column, which was always conditioned with the ACN/water/AcOH (47:53:0.1, v/v/v) containing mobile phase before each analysis run.**

Before each analysis, the column was equilibrated for 30 min with the selected mobile phase.

A Combitherm-2 CH-3-150 heating/cooling thermostat (from BioSan, Riga, Latvia) was used for the derivatization processes.

## **Derivatization of Amk**

An aliquot of 100  $\mu\text{L}$  supernatant (containing the extracted Amk), obtained by centrifugation, was transferred into a screw-capped tube and dried under vacuum (40  $^{\circ}\text{C}$ ). Then, the dried residue was resuspended in 100  $\mu\text{L}$  of water and mixed with 100  $\mu\text{L}$  of 1% (w/v) water solution of TRIS [tris(hydroxymethyl)aminoethane], 200  $\mu\text{L}$  of DMSO (dimethyl sulfoxide) and 200  $\mu\text{L}$  of F-DNB (1-fluoro-2,4-dinitrobenzene) in 95% ethanol (w/v). The tube containing the reaction mixture was vortexed for 30 s and finally incubated at 55  $^{\circ}\text{C}$  in a Combitherm dry-block heater for 40 min. Once cooled at room temperature, the solution was transferred into a micro vial and submitted to HPLC analysis. The standard solutions of Amk (as disulfate – AmkDS) were submitted to the same derivatization procedure.

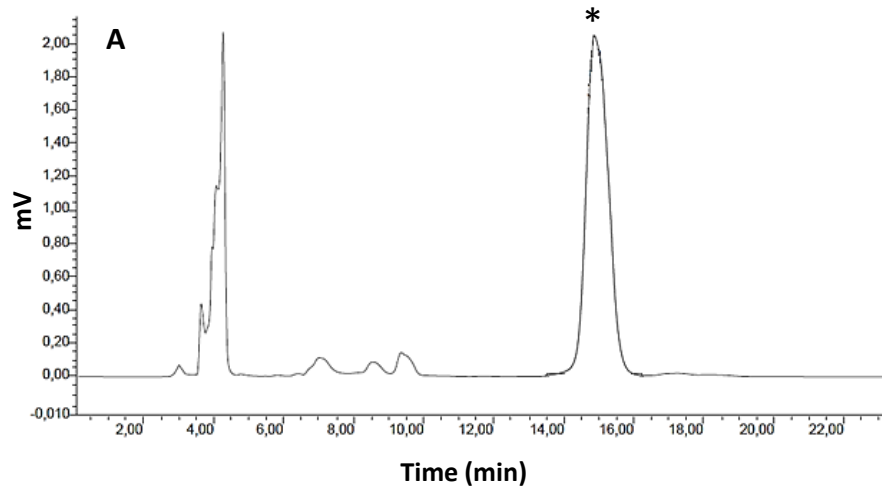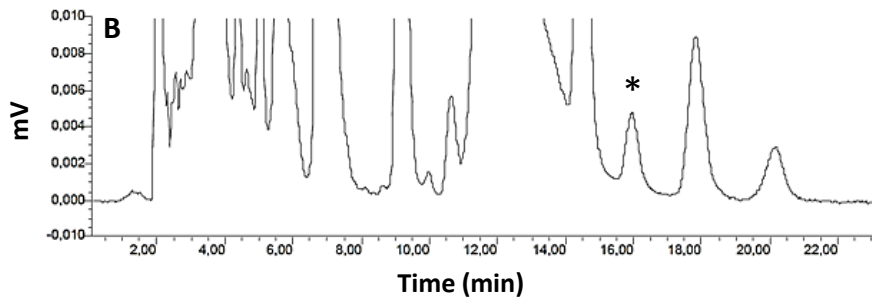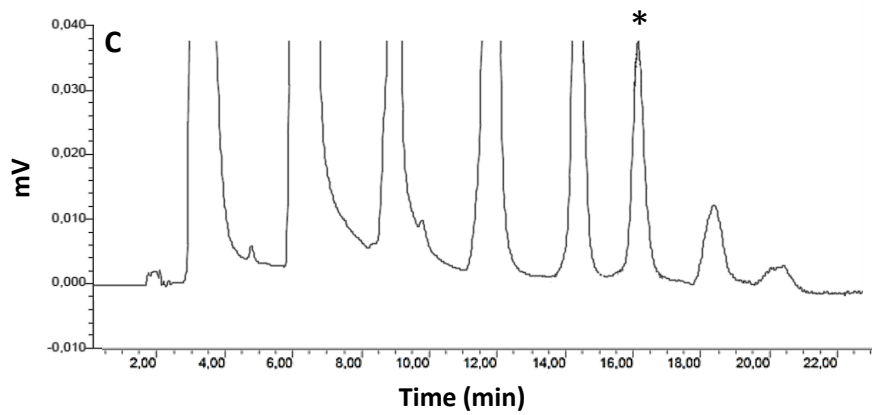

Figure S1. Chromatogram of (A) AmkDS standard solution; (B) an exemplary WB sample; (C) an exemplary WB sample spiked with AmkDS standard. In all cases, the analysis was performed after pre-column derivatization with F-DNB.
